9. Handbook of Chemistry and Physics. 46th edition. The Chemical Rubber Co., Cleveland, 1965
10. Hill AV: The energetics of relaxation in a muscle twitch. *Proc Roy Soc (Lond) B* 136: 211-219, 1949
11. Zachariah P: Contractility and sugar permeability in the perfused rat heart. *J Physiol* 158:59-72, 1961
12. Bacaner MB, Liou F, Visscher MB: Coronary blood flow, oxygen delivery rate, and cardiac performance. *J Physiol* 216:111-127, 1971
13. Draper NR, Smith H: *Applied Regression Analysis*. New York, John Wiley and Sons, 1968, chapter 1
14. Mommaerts WFHM: Energetics of muscular contraction. *Physiol Rev* 49:427-508, 1969
15. Smith ICH: Energetics of activation in frog and toad muscle. *J Physiol (Lond)* 220: 583-599, 1972
16. Samoff S, Braunwald E, Welch GH, et al: Hemodynamic determinants of oxygen consumption of the heart with special reference to the tension-time index. *Am J Physiol* 192:148-156, 1958
17. Monroe RC, French GN: Left ventricular pressure-volume relationships and myocardial oxygen consumption in the isolated heart. *Circ Res* 9:362-374, 1961
18. McKeever WP, Gregg DE, Canney PC: Oxygen uptake of the nonworking left ventricle. *Circ Res* 6:612-623, 1958
19. Gibbs CL: Role of catecholamines in heat production in the myocardium. *Circ Res* 21 (suppl 3):223-230, 1967
20. Chapman JB, Gibbs CL, Gibson WR: Effects of calcium and sodium on cardiac contractility and heat production in rabbit papillary muscle. *Circ Res* 27:601-610, 1970
21. Jobsis FF, Duffield JC: Force, shortening, and work in muscular contraction: Relative contribution to overall energy utilization. *Science* 156:1388-1392, 1967
22. Infante AA, Klaupikis D, Davies RE: Relation between length of muscle and breakdown of phosphorylcreatine in isometric tetanic contractions. *Nature* 201:620, 1964
23. Sandberg JA, Carlson FD: The length dependence of phosphorylcreatine hydrolysis during an isometric tetanus. *Biochem Z* 345:212-231, 1966
24. Pool PE, Sonnenblick EH: The mechanochemistry of cardiac muscle. 1. The isometric contraction. *J Gen Physiol* 50:951-965, 1967
25. Gibbs CL, Gibson WR: The effect of alterations in the stimulus rate upon energy output, tension development, and tension-time integral of cardiac muscle in rabbits. *Circ Res* 28:611-618, 1970
26. Britman NA, Levine HJ: Contractile element work: A major determinant of myocardial oxygen consumption. *J Clin Invest* 43: 1397-1408, 1964
27. Ruch TC, Patton HD: *Physiology and Biophysics*. Nineteenth edition. Philadelphia: W. B. Saunders, 1965, chapter 36
28. Gibbs CL, Gibson WR: Isoprenaline, propranolol, and the energy of rabbit cardiac muscle. *Cardiovasc Res* 6:508-515, 1972
29. Gibbs CL, Gibson WR: Effect of ouabain on the energy output of rabbit cardiac muscle. *Circ Res* 24:951-967, 1969
30. Hoeck GP, Matteo RS, Fink RB: Effect of halothane on oxygen consumption of rat brain, liver, and heart, and anaerobic glycolysis of rat brain. *ANESTHESIOLOGY* 27: 770-777, 1966

## Neurology

### BRACHIAL PLEXUS NEUROPATHY

If traction, direct trauma, purulent infection, malignancy, diffuse neuropathy, and myelopathy are all excluded as etiologic factors, a small number of patients may still develop brachial plexus neuropathy. Its etiology is obscure. Ninety-nine patients were followed over a period of several years. The disease may involve either the upper or lower brachial plexus, or both. Involvement is often bilateral. The onset is rapid, marked by pain and followed within two weeks by various degrees of weakness or paralysis. Mild to profound atrophy is seen in most cases, especially

with lesions that affect the shoulder-girdle muscles. The prognosis of this disorder is excellent. The overall rate of recovery, calculated by the actuarial method of life-person analysis, showed that 36 per cent recovered within one year, 75 per cent in two years, and 89 per cent by the end of the third year. Neither severity nor type of lesion nor therapy with steroids and/or physical therapy appeared to affect the course of the illness or shorten the time to full functional recovery (Tsairis, P., Dyck, P. J., and Mulder, D. W. *Natural History of Brachial Plexus Neuropathy*. *Arch. Neurol.* 27: 109, 1972.)
